# Supplementary material for: Prostate cancer screening in Primary Health Care: the current state of affairs
Source: PubMed Central journal article supplement (PMC4332913; doi:10.1186/s40064-015-0819-8), 2015-02-13
Supplement: 40064_2015_819_MOESM1_ESM.pdf [file 40064_2015_819_MOESM1_ESM.pdf]

# Current practice in screening for prostate cancer in primary care: A

## 1. What is your gender?

- Female
- Male

## 2. What is your age?

- Less than 40 years
- 41 to 49 years
- 50 to 59 years
- 60 to 69 years
- More than 70 years

## 3. How many years have you been in practice?

Years in practice:

## 4. How would you classify your race?(Check one.)

- Asian or Asian American
- Black or African-American
- Hispanic or Latino
- White or Caucasian
- Other

## 5. Which state is your practice located?

|                   | Metropolitan          | Regional              | Rural                 |
|-------------------|-----------------------|-----------------------|-----------------------|
| Victoria          | <input type="radio"/> | <input type="radio"/> | <input type="radio"/> |
| New South Wales   | <input type="radio"/> | <input type="radio"/> | <input type="radio"/> |
| ACT               | <input type="radio"/> | <input type="radio"/> | <input type="radio"/> |
| Western Australia | <input type="radio"/> | <input type="radio"/> | <input type="radio"/> |
| NT                | <input type="radio"/> | <input type="radio"/> | <input type="radio"/> |
| South Australia   | <input type="radio"/> | <input type="radio"/> | <input type="radio"/> |
| Queensland        | <input type="radio"/> | <input type="radio"/> | <input type="radio"/> |
| Tasmania          | <input type="radio"/> | <input type="radio"/> | <input type="radio"/> |
| New Zealand       | <input type="radio"/> | <input type="radio"/> | <input type="radio"/> |
| UK                | <input type="radio"/> | <input type="radio"/> | <input type="radio"/> |

# Current practice in screening for prostate cancer in primary care: A

## Please answer the following items about prostate cancer screening and guide...

Assume an average risk man is a patient without any significant comorbidity or family history of prostate cancer, and a greater than 10 year life expectancy.

### 1. How effective do you believe the following screening tests and primary therapies are in reducing cancer mortality due to prostate cancer in an average risk man? (Please check one box on each line.)

|                                 | Very effective        | Somewhat effective    | Not effective         | Not sure              |
|---------------------------------|-----------------------|-----------------------|-----------------------|-----------------------|
| PROSTATE-SPECIFIC ANTIGEN (PSA) | <input type="radio"/> | <input type="radio"/> | <input type="radio"/> | <input type="radio"/> |
| DIGITAL RECTAL EXAM (DRE)       | <input type="radio"/> | <input type="radio"/> | <input type="radio"/> | <input type="radio"/> |
| RADICAL PROSTATECTOMY           | <input type="radio"/> | <input type="radio"/> | <input type="radio"/> | <input type="radio"/> |
| EXTERNAL BEAM RADIATION (EBT)   | <input type="radio"/> | <input type="radio"/> | <input type="radio"/> | <input type="radio"/> |
| ACTIVE SURVEILLANCE             | <input type="radio"/> | <input type="radio"/> | <input type="radio"/> | <input type="radio"/> |

### 2. To what extent does your practice recommend the following screening test as the "best practice" for the following age groups of an average risk man? Please indicate for each age group.

#### DIGITAL RECTAL EXAM (DRE)

|                    | Every year            | Every 2 years         | Every 5 years         | Would not recommend   | Other                 |
|--------------------|-----------------------|-----------------------|-----------------------|-----------------------|-----------------------|
| 40 to 69 years     | <input type="radio"/> | <input type="radio"/> | <input type="radio"/> | <input type="radio"/> | <input type="radio"/> |
| 50 to 59 years     | <input type="radio"/> | <input type="radio"/> | <input type="radio"/> | <input type="radio"/> | <input type="radio"/> |
| 70 to 75 years     | <input type="radio"/> | <input type="radio"/> | <input type="radio"/> | <input type="radio"/> | <input type="radio"/> |
| More than 75 years | <input type="radio"/> | <input type="radio"/> | <input type="radio"/> | <input type="radio"/> | <input type="radio"/> |

Other (please specify)

### 3. To what extent does your practice recommend the following screening test as the "best practice" for the following age groups of an average risk man? Please indicate for each age group.

#### PROSTATE-SPECIFIC ANTIGEN (PSA)

|                    | Every year            | Every 2 years         | Every 5 years         | Would not recommend   | Other                 |
|--------------------|-----------------------|-----------------------|-----------------------|-----------------------|-----------------------|
| 40 to 69 years     | <input type="radio"/> | <input type="radio"/> | <input type="radio"/> | <input type="radio"/> | <input type="radio"/> |
| 50 to 59 years     | <input type="radio"/> | <input type="radio"/> | <input type="radio"/> | <input type="radio"/> | <input type="radio"/> |
| 70 to 75 years     | <input type="radio"/> | <input type="radio"/> | <input type="radio"/> | <input type="radio"/> | <input type="radio"/> |
| More than 75 years | <input type="radio"/> | <input type="radio"/> | <input type="radio"/> | <input type="radio"/> | <input type="radio"/> |

Other (please specify)

## Current practice in screening for prostate cancer in primary care: A

**4. How influential are the recommendations regarding prostate cancer screening from the following organizations on the content of your residency education curriculum on this topic? (Please check one box on each line.)**

|                                                     | Very influential      | Somewhat influential  | Not influential       | Don't know            |
|-----------------------------------------------------|-----------------------|-----------------------|-----------------------|-----------------------|
| Urology Society of Australia and New Zealand        | <input type="radio"/> | <input type="radio"/> | <input type="radio"/> | <input type="radio"/> |
| Royal College of Surgeons                           | <input type="radio"/> | <input type="radio"/> | <input type="radio"/> | <input type="radio"/> |
| Royal Australasian College of General Practitioners | <input type="radio"/> | <input type="radio"/> | <input type="radio"/> | <input type="radio"/> |
| U.S. Preventive Services Task Force                 | <input type="radio"/> | <input type="radio"/> | <input type="radio"/> | <input type="radio"/> |
| American Cancer Society                             | <input type="radio"/> | <input type="radio"/> | <input type="radio"/> | <input type="radio"/> |
| European Urological Association Guidelines          | <input type="radio"/> | <input type="radio"/> | <input type="radio"/> | <input type="radio"/> |

**5. The U.S. Preventive Services Task Force recently changed their recommendations to against the routine use of Prostate-Specific Antigen (PSA) and Digital Rectal Exam (DRE) for prostate cancer screening in asymptomatic men. To what extent to you agree or disagree with this new recommendation?**

- Strongly agree
- Somewhat agree
- Somewhat disagree
- Strongly disagree
- Don't know

**6. How effective do you believe the following screening test parameters provided by the pathologist as references are (usually in brackets next to the PSA result or below the test as an addendum)? (Please check one box on each line.)**

|                               | Effective             | Not effective         |
|-------------------------------|-----------------------|-----------------------|
| The median PSA level provided | <input type="radio"/> | <input type="radio"/> |
| Age-related ranges of PSA     | <input type="radio"/> | <input type="radio"/> |
| The Free: total PSA ratio     | <input type="radio"/> | <input type="radio"/> |

**7. Are you aware of a recently introduced blood test called the Prostate Health Index?**

- Yes
- No

**8. If 'Yes' to Question 12, do you utilize it?**

- Yes
- No

## Current practice in screening for prostate cancer in primary care: A

**9. Due to all the confusion is it easier simply to refer to a urologists if there is any doubt about a result?**

- Yes
- No

**10. With the new drug for BPH treatment dutasteride now available and the older drug finasteride(both 5-alpha reductase inhibitors) do you believe such agents may have an impact on a patient's PSA?**

- Yes
- No
- Unsure

**11. At what PSA level would you recommend a urology referral?**

- Less than 2
- Between 2 and 5
- Between 5 and 10
- Greater than 10
